# Supplementary material for: Lung Ultrasound Is Useful for Evaluating Lung Damage in COVID-19 Patients Treated with Bamlanivimab and Etesevimab: A Single-Center Pilot Study
Source: MDPI journal article supplement (doi:10.3390/medicina59020203), 2023-01-19

**Supplementary table S1:** comparison between spirometry results between the two groups studied at T1

| Parameters                          |        | Group 1        | Group 2        | P value |
|-------------------------------------|--------|----------------|----------------|---------|
| Forced expiratory volume 1st second | Liters | 2.82 ± 0.72    | 3.02 ± 0.88    | Ns      |
|                                     | %      | 101.12 ± 21.54 | 97.78 ± 18.94  | Ns      |
| Forced Vital Capacity               | Liters | 3.60 ± 0.65    | 3.79 ± 1.06    | Ns      |
|                                     | %      | 106.33 ± 22.03 | 100.93 ± 17.58 | Ns      |
| Tiffeneau Index                     | Liters | 77.17 ± 8.23   | 79.54 ± 10.49  | Ns      |
|                                     | %      | 99.33 ± 10.48  | 98.54 ± 14.81  | Ns      |
| Forced expiratory flow 25%          | Liters | 5.21 ± 1.96    | 5.91 ± 1.90    | Ns      |
|                                     | %      | 81.33 ± 23.58  | 82.85 ± 27.23  | Ns      |
| Forced expiratory flow 50%          | Liters | 3.48 ± 1.88    | 3.69 ± 1.31    | Ns      |
|                                     | %      | 84.50 ± 40.39  | 82.98 ± 28.34  | Ns      |
| Forced expiratory flow 75%          | Liters | 2.65 ± 1.19    | 2.93 ± 1.17    | Ns      |
|                                     | %      | 80.00 ± 32.32  | 81.39 ± 31.32  | Ns      |
| Forced expiratory flow 25-75%       | Liters | 1.43 ± 0.85    | 1.43 ± 0.88    | Ns      |
|                                     | %      | 72.33 ± 24.72  | 78.56 ± 45.20  | Ns      |

**Supplementary table S2:** segment evaluation for each patient in Group 1 population as T0 and T1

|    | T0 |    |    |    |    |    |    |    |    |    |    |    |                        |                  | T1 |    |    |    |    |    |    |    |    |    |    |    |                        |                  |
|----|----|----|----|----|----|----|----|----|----|----|----|----|------------------------|------------------|----|----|----|----|----|----|----|----|----|----|----|----|------------------------|------------------|
| ID | R1 | R2 | R3 | R4 | R5 | R6 | L1 | L2 | L3 | L4 | L5 | L6 | Increased pleural line | Pleural effusion | R1 | R2 | R3 | R4 | R5 | R6 | L1 | L2 | L3 | L4 | L5 | L6 | Increased pleural line | Pleural effusion |
| 1  | 0  | 0  | 0  | 0  | 0  | 1  | 0  | 1  | 0  | 1  | 0  | 1  | Yes                    | Yes              | 1  | 0  | 0  | 1  | 1  | 1  | 0  | 0  | 0  | 1  | 1  | 1  | Yes                    | NO               |
| 2  | 0  | 1  | 0  | 1  | 0  | 0  | 1  | 1  | 0  | 0  | 0  | 0  | Yes                    | NO               | 0  | 0  | 0  | 0  | 0  | 0  | 0  | 0  | 0  | 0  | 0  | 0  | Yes                    | NO               |
| 3  | 1  | 1  | 1  | 2  | 1  | 3  | 1  | 2  | 1  | 2  | 1  | 2  | Yes                    | NO               | 1  | 1  | 1  | 1  | 1  | 2  | 1  | 1  | 1  | 1  | 1  | 1  | Yes                    | NO               |
| 4  | 0  | 0  | 0  | 0  | 0  | 1  | 0  | 0  | 1  | 0  | 1  | 2  | Yes                    | NO               | 0  | 1  | 0  | 1  | 0  | 1  | 0  | 0  | 1  | 0  | 1  | 1  | Yes                    | NO               |
| 5  | 0  | 0  | 0  | 0  | 0  | 1  | 0  | 0  | 0  | 1  | 0  | 1  | Yes                    | NO               | 0  | 0  | 0  | 0  | 0  | 0  | 0  | 0  | 0  | 1  | 0  | 0  | No                     | NO               |
| 6  | 0  | 0  | 0  | 0  | 0  | 1  | 0  | 0  | 1  | 0  | 0  | 1  | Yes                    | NO               | 0  | 0  | 0  | 0  | 0  | 0  | 0  | 0  | 1  | 0  | 0  | 0  | No                     | NO               |
| 7  | 0  | 0  | 0  | 1  | 1  | 2  | 1  | 0  | 0  | 0  | 0  | 2  | Yes                    | NO               | 0  | 1  | 0  | 0  | 0  | 0  | 0  | 0  | 0  | 0  | 0  | 1  | No                     | NO               |
| 8  | 0  | 0  | 0  | 1  | 0  | 1  | 1  | 0  | 0  | 0  | 0  | 1  | Yes                    | NO               | 0  | 0  | 0  | 0  | 0  | 0  | 0  | 0  | 0  | 0  | 1  | 0  | No                     | NO               |
| 9  | 0  | 0  | 1  | 0  | 0  | 2  | 0  | 0  | 0  | 0  | 1  | 2  | Yes                    | NO               | 1  | 0  | 1  | 1  | 0  | 1  | 1  | 0  | 1  | 0  | 1  | 2  | Yes                    | NO               |
| 10 | 1  | 1  | 1  | 2  | 1  | 3  | 1  | 2  | 1  | 2  | 1  | 2  | Yes                    | NO               | 1  | 1  | 1  | 1  | 1  | 2  | 1  | 1  | 1  | 1  | 1  | 1  | Yes                    | NO               |
| 11 | 0  | 1  | 1  | 2  | 0  | 2  | 1  | 1  | 1  | 2  | 1  | 2  | Yes                    | NO               |    | 1  | 1  | 1  | 0  | 1  | 1  | 1  | 1  | 1  | 1  | 1  | Yes                    | NO               |
| 12 | 1  | 1  | 2  | 2  | 1  | 2  | 1  | 2  | 1  | 2  | 2  | 2  | Yes                    | NO               | 0  | 1  | 0  | 1  | 1  | 1  | 0  | 0  | 1  | 0  | 1  | 1  | Yes                    | NO               |
| 13 | 0  | 0  | 1  | 0  | 0  | 0  | 1  | 0  | 0  | 1  | 0  | 0  | Yes                    | NO               | 0  | 0  | 0  | 0  | 0  | 0  | 0  | 0  | 0  | 0  | 0  | 0  | Yes                    | NO               |
| 14 | 0  | 0  | 0  | 1  | 1  | 2  | 1  | 0  | 0  | 0  | 0  | 2  | Yes                    | NO               | 0  | 1  | 0  | 0  | 0  | 0  | 0  | 0  | 0  | 0  | 0  | 1  | No                     | NO               |
| 15 | 0  | 0  | 0  | 0  | 0  | 1  | 0  | 0  | 1  | 0  | 1  | 2  | Yes                    | NO               | 0  | 1  | 0  | 1  | 0  | 1  | 0  | 0  | 1  | 0  | 1  | 1  | Yes                    | NO               |

**Supplementary Table S3:** Day of recovery (evaluated as dependent variable), relates differently in patients who experienced MAb (Group 1) and who did not (Group 2).

|        | Group 1 |         |
|--------|---------|---------|
|        | R       | T0<br>p |
| pH     | 0.575   | 0.002   |
| pO2    | -0.241  | Ns      |
| pCO2   | 0.567   | 0.002   |
| P/F    | -0.241  | Ns      |
| HCO3-  | -0.271  | Ns      |
| SaO2   | -0.240  | Ns      |
| A-aDO2 | 0.443   | 0.023   |
| LUS    | 0.391   | 0.048   |

**Supplementary Table S4:** Day of recovery (evaluated as independent variable), relates differently in patients who experienced MAb (Group 1) and who did not (Group 2).

|                               | Group 1 |                | Group 2 |        |
|-------------------------------|---------|----------------|---------|--------|
|                               | R       | T1             | R       | T1     |
|                               |         | R <sup>2</sup> |         | p      |
| pH                            | 0.053   | Ns             | 0.709   | 0.001  |
| pO <sub>2</sub>               | -0.444  | 0.04           | 0.006   | Ns     |
| pCO <sub>2</sub>              | 0.025   | Ns             | 0.792   | 0.0001 |
| P/F                           | -0.444  | 0.04           | -0.361  | Ns     |
| HCO <sub>3</sub> <sup>-</sup> | -0.016  | Ns             | 0.709   | 0.001  |
| SaO <sub>2</sub>              | -0.157  | Ns             | 0.147   | Ns     |
| A-aDO <sub>2</sub>            | 0.458   | 0.032          | -0.123  | Ns     |
| LUS                           | 0.548   | 0.008          | -0.001  | Ns     |

**Supplementary Figure S1:** examples of LUS in patient who recovered (upper panels) and who did not (lower panels). Stars indicated ultrasonographic image of B-lines

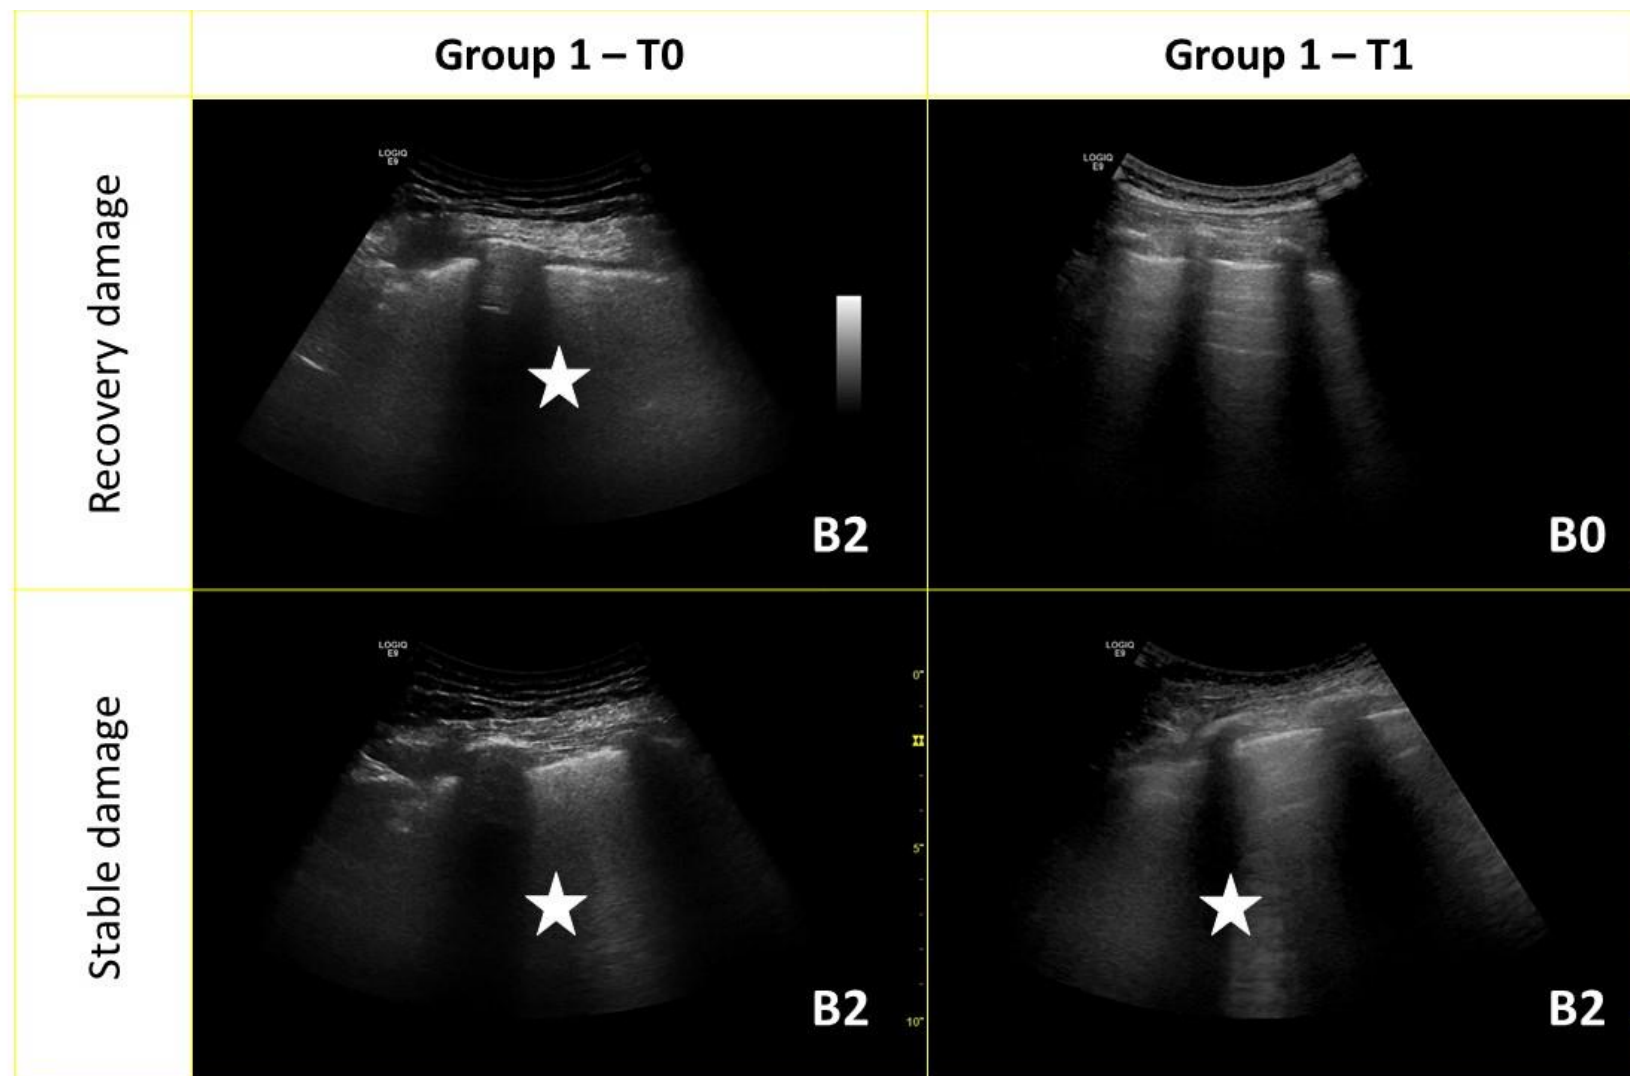

Supplement: s1 [file s1]
